# Supplementary material
Source: publisher figshare collection journal article supplement (https://acs.figshare.com/ndownloader/files/3884347)
Supplement: Supplementary file 1 [file 3884347]

*Supporting Information for:*

**Nitrate Removal in Shallow, Open-Water Treatment Wetlands**

Justin T. Jasper,<sup>1,2</sup> Zackary L. Jones,<sup>1,3</sup> Jonathan O. Sharp,<sup>1,3</sup> David L. Sedlak<sup>1,2\*</sup>

<sup>1</sup>ReNUWIt Engineering Research Center

<sup>2</sup>Department of Civil & Environmental Engineering  
University of California at Berkeley  
Berkeley, CA 94720

<sup>3</sup>Department of Civil & Environmental Engineering  
Colorado School of Mines  
Golden, CO 80401

***14 pages***  
***10 figures***  
***2 tables***

\*corresponding author: Contact information: e-mail: [sedlak@berkeley.edu](mailto:sedlak@berkeley.edu)

**Table SI 1. Wetland Temperatures<sup>a</sup>**

| <b>Month</b> | <b>Average<br/>Temperature (°C)</b> |
|--------------|-------------------------------------|
| January      | 8.6±0.4                             |
| February     | 9.8±0.3                             |
| March        | 11.9±0.3                            |
| April        | 14.4±1.0                            |
| May          | 16.8±0.7                            |
| June         | 20.0±0.3                            |
| July         | 22.0±0.2                            |
| August       | 22.3±0.4                            |
| September    | 21.7±0.5                            |
| October      | 17.5±0.3                            |
| November     | 12.4±0.5                            |
| December     | 9.3±0.3                             |

<sup>a</sup> Average monthly temperatures reported in Livermore, CA from 2007-2012 ± standard error of the mean.<sup>5</sup>

**Table SI 2.** QPCR Primers and Thermal Profiles

| Primer Name   | Primer Sequence 5'-3'     | [Primer ] (nM) | Amplicon Size | Target Gene | Thermal Profile                                                                                                                                           | Reference                                |
|---------------|---------------------------|----------------|---------------|-------------|-----------------------------------------------------------------------------------------------------------------------------------------------------------|------------------------------------------|
| cd3aF         | GTSAACGTSA<br>AGGARACSGG  | 500            | 425           | nirS        | 95°C 10 min, 6<br>touchdown cycles [95°C<br>15 s, 63–58°C (–1°C<br>per cycle) 30 s, 72°C<br>30 s,] then 35 cycles<br>(95°C 15 s, 58°C 30 s,<br>72°C 30 s) | Throbäck<br>et al.,<br>2004 <sup>1</sup> |
| R3cd          | GASTTCGGRT<br>GSGTCTTGA   | 500            |               |             |                                                                                                                                                           |                                          |
| nirK876       | ATYGGCGGVA<br>YGGCGA      | 500            | 164           | nirK        | 95°C 10 min, 6<br>touchdown cycles [95°C<br>15 s, 63–58°C (–1°C<br>per cycle) 30 s, 72°C<br>30 s,] then 35 cycles<br>(95°C 15 s, 58°C 30 s,<br>72°C 30 s) | Henry et<br>al. 2004 <sup>2</sup>        |
| nirK1040      | GCCTCGATCA<br>GRTTTRTGGTT | 500            |               |             |                                                                                                                                                           |                                          |
| hzsA1597<br>F | WTYGGKTATC<br>ARTATGTAG   | 400            | 260           | hzs         | 95°C 3min, 40 cycles<br>(95°C 30 s, 55°C 30 s ,<br>72°C 30 s)                                                                                             | Harhangi<br>et al.,<br>2011 <sup>3</sup> |
| hzsA1857<br>R | AAABGGYGAA<br>TCATARTGGC  | 400            |               |             |                                                                                                                                                           |                                          |
| EUB338        | ACTCCTACGG<br>GAGGCAGCAG  | 1000           | 180           | 16S         | 95°C 3min, 40 cycles<br>(95°C 60 s, 53°C 30 s ,<br>72°C 60 s)                                                                                             | Fierer et<br>al., 2005 <sup>4</sup>      |
| EUB518        | ATTACCGCGG<br>CTGCTGG     | 1000           |               |             |                                                                                                                                                           |                                          |

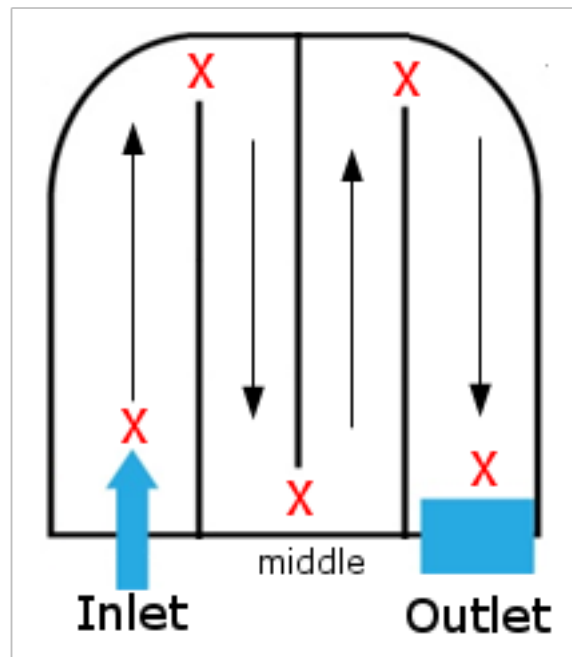

**Figure SI 1.** Schematic of open-water wetland cell. **X** symbols represent sampling points.

Black arrows show flow direction.

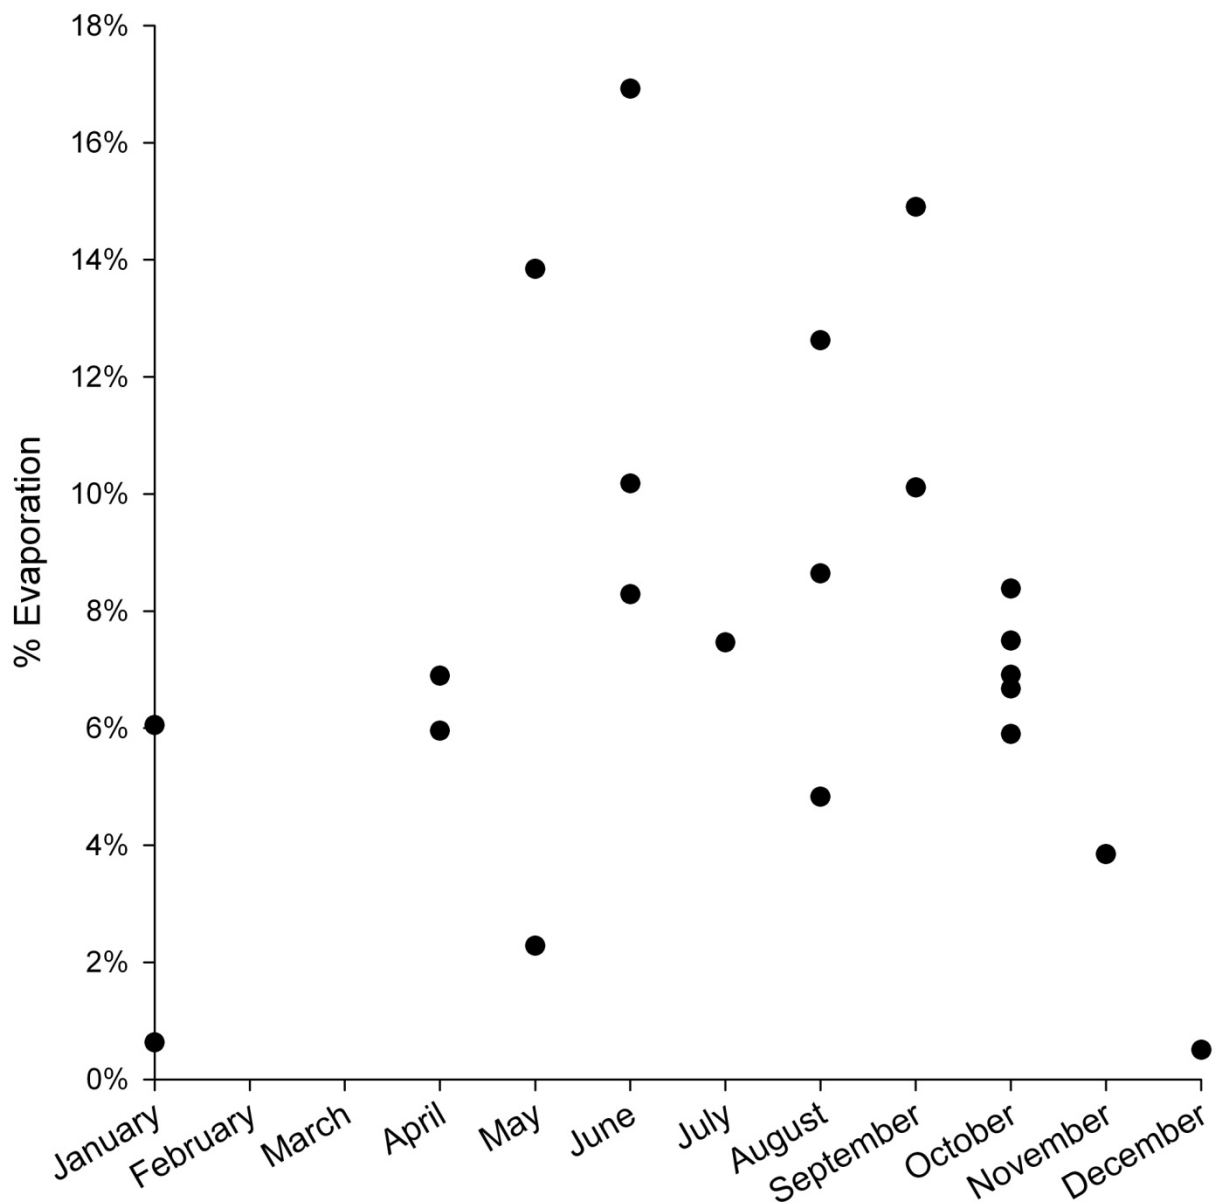

**Figure SI 2.** Percent evaporation between inlet and outlet of pilot-scale wetland cell throughout the year, calculated based on  $\text{Cl}^-$  concentrations.

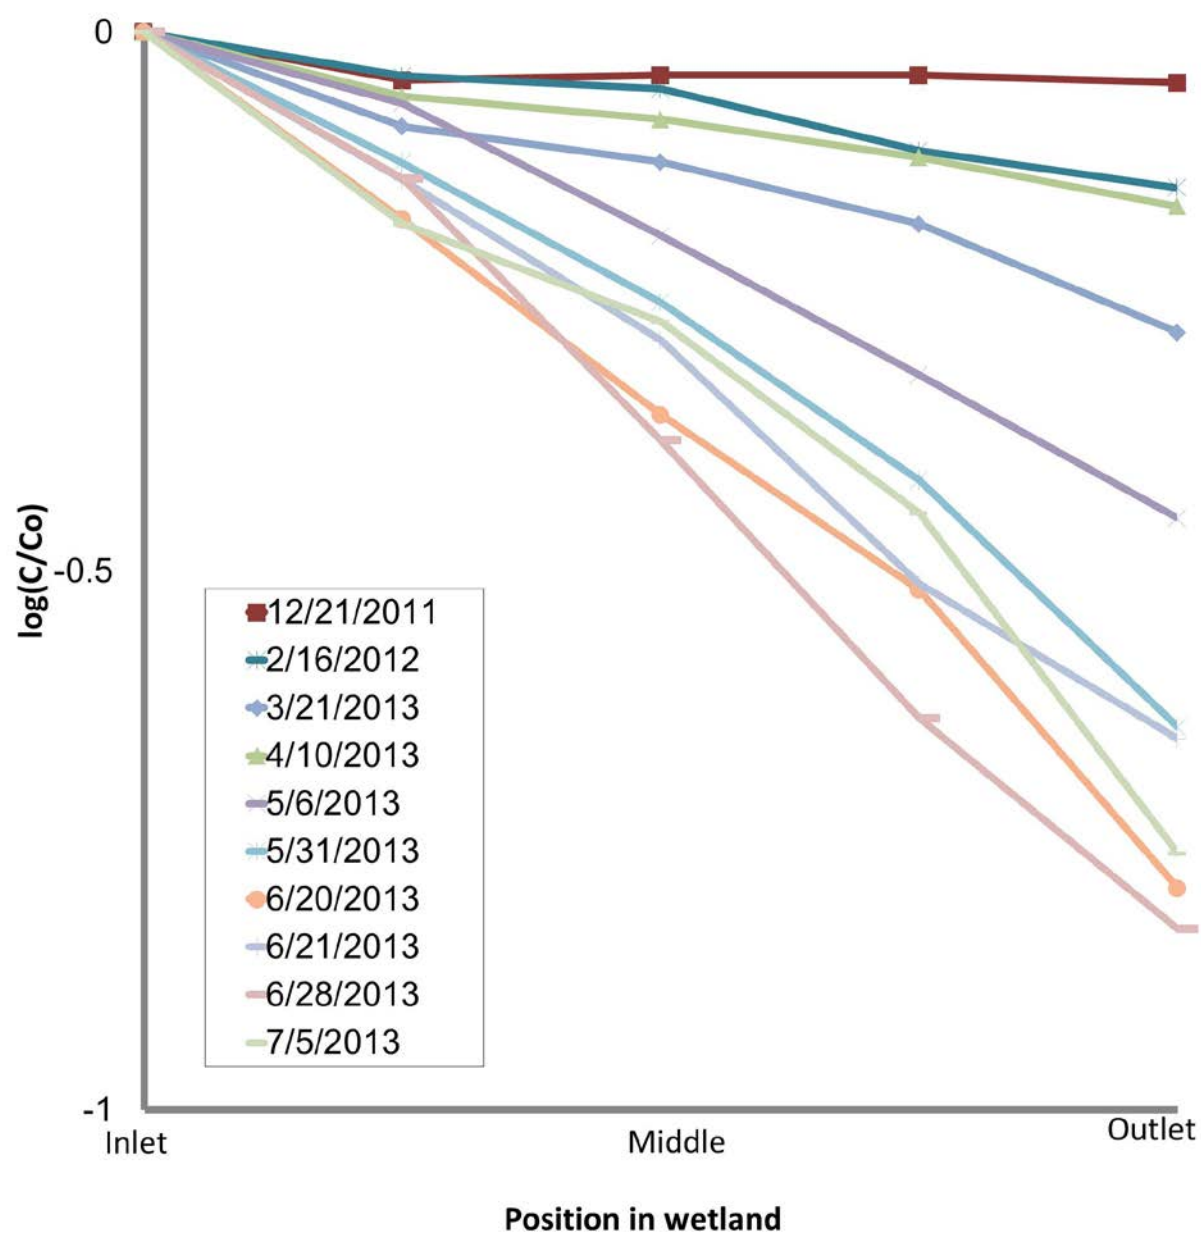

**Figure SI 3.** Semi-log plot of  $\text{NO}_3^-$  removal along flow-path in Discovery Bay pilot-scale open-water wetland cell. For clarity, a limited data set is plotted. Other data exhibited similar kinetics.

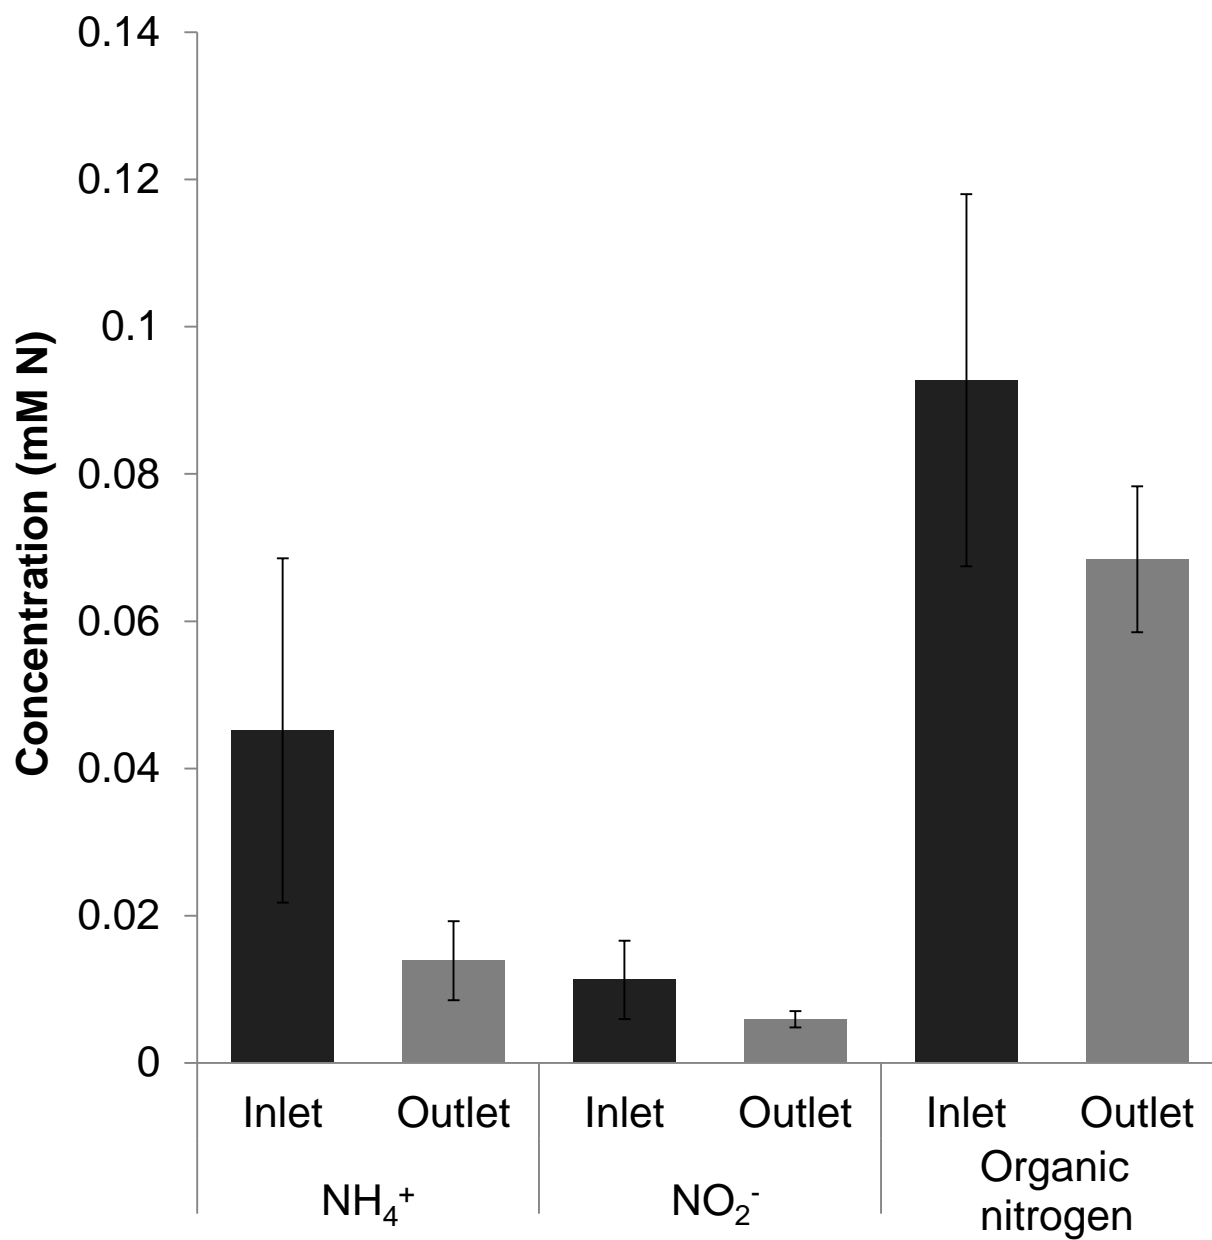

**Figure SI 4.** Average inlet and outlet concentrations of nitrogen species  $\pm$  standard error of the mean (n=3-5).

1

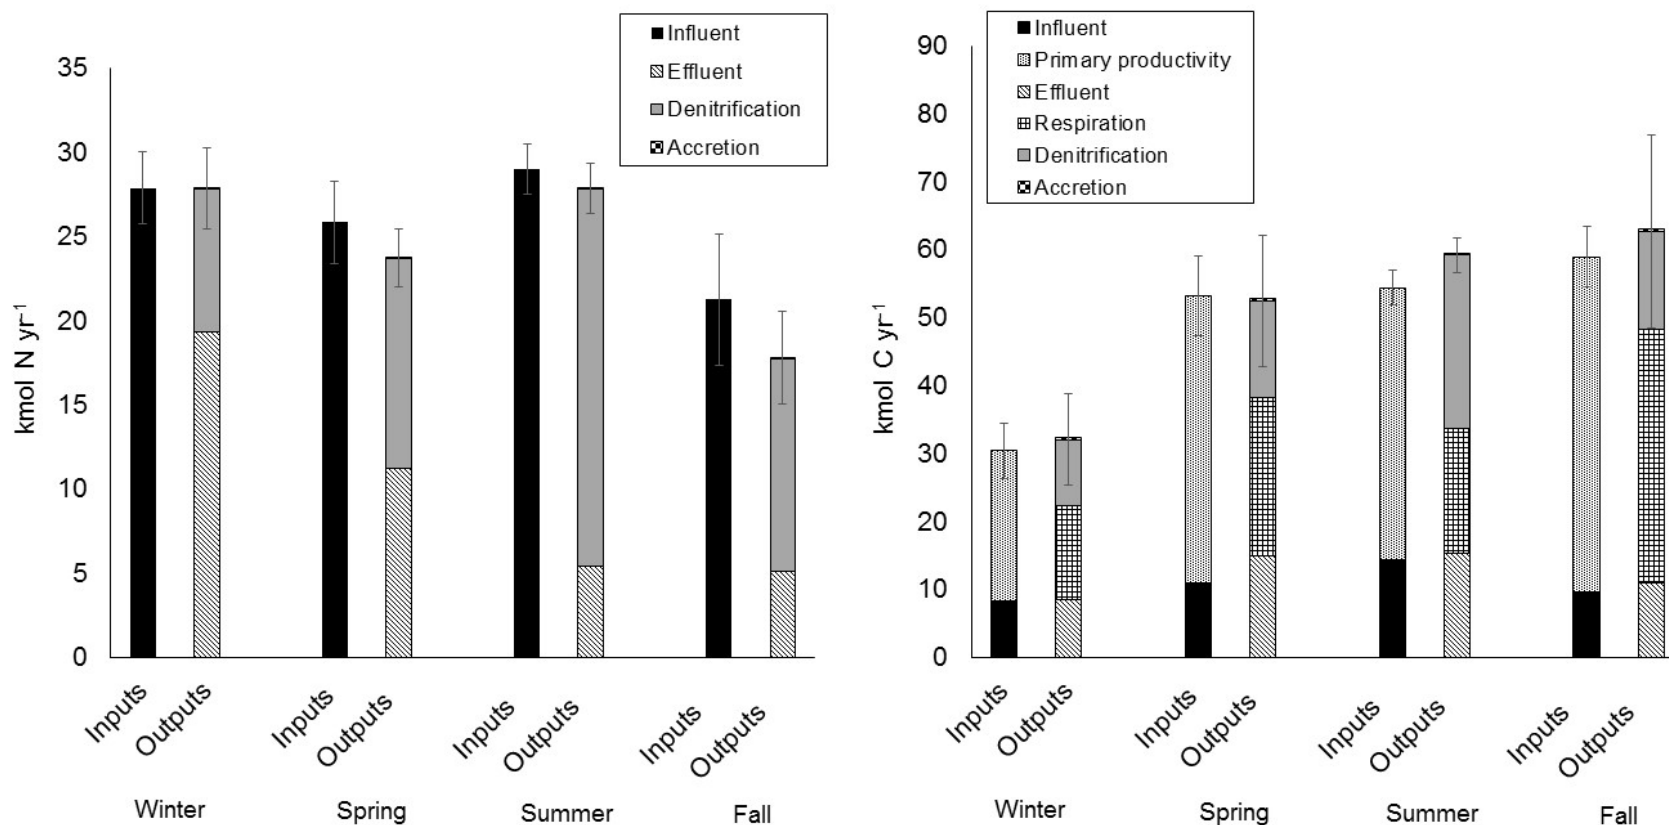

2

3

4

5

6

7

8

**Figure SI 5.** Nitrogen (left) and carbon (right) seasonal mass balances (average  $\pm$  standard error of the mean) for Discovery Bay open-water wetland during 2012-2013. Accretion fluxes are based on measured biomat elemental composition ( $32 \pm 1\%$  organics) and measured accumulation rate. Primary productivity and aerobic respiration fluxes are based on diurnal oxygen profiles. Denitrification fluxes calculated using rates measured in acetylene-block microcosms, corrected and averaged by monthly average temperatures.



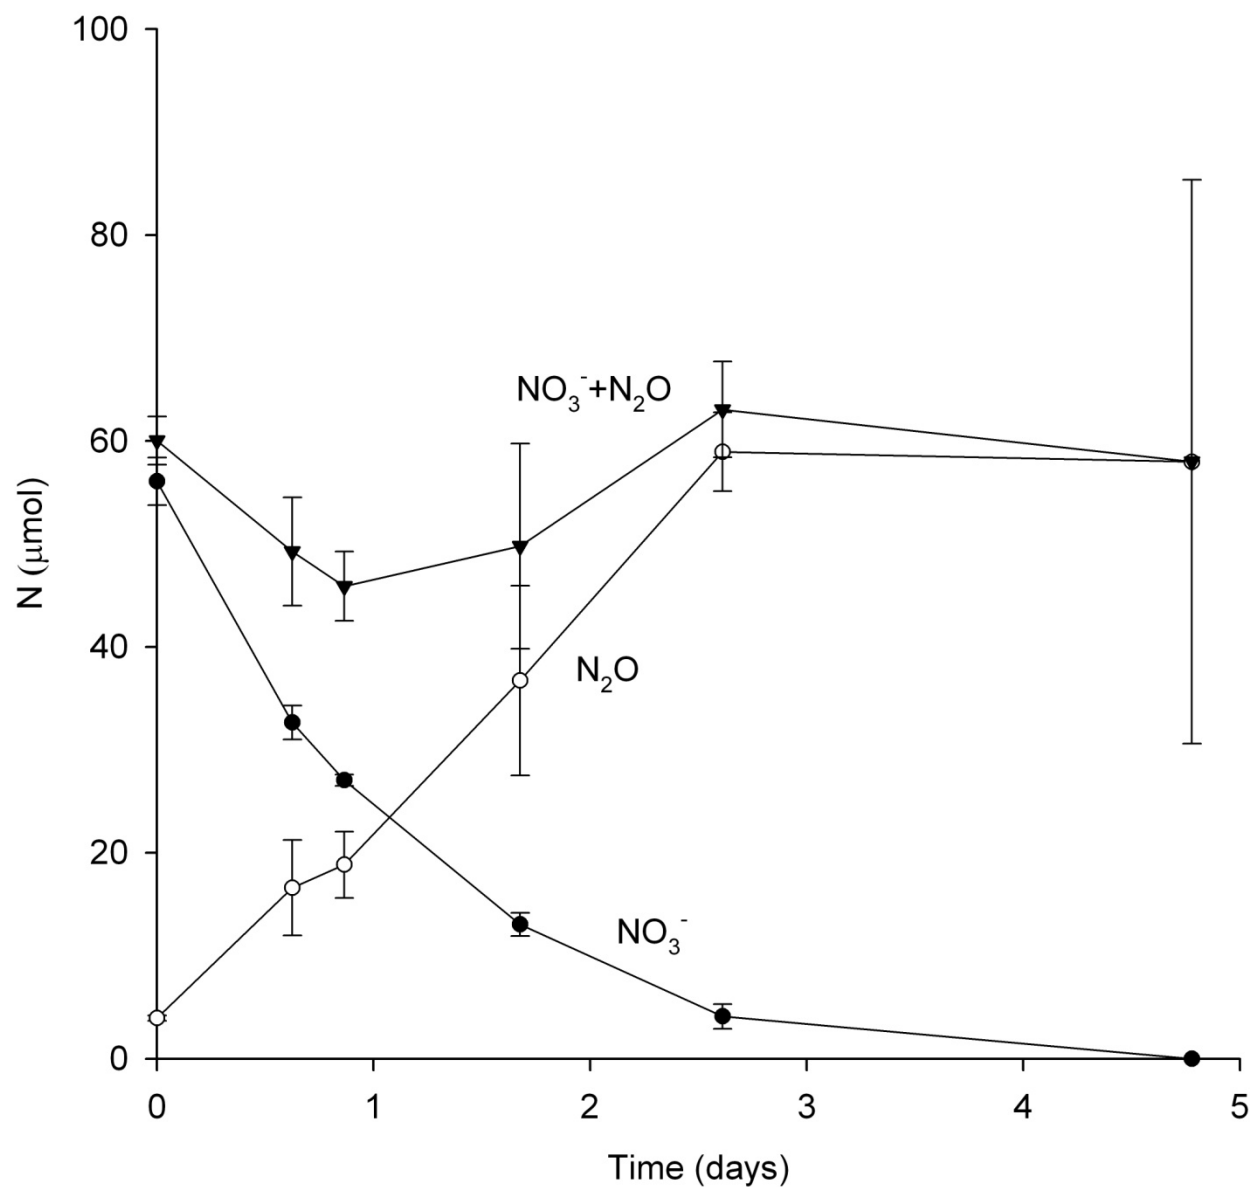

**Figure SI 6.** Conversion of  $\text{NO}_3^-$  to  $\text{N}_2\text{O}$  via partial denitrification in anoxic microcosms amended with acetylene gas (5 mL; ~10% v/v). Experiment conducted at 22°C. Error bars represent  $\pm$  one standard deviation (n=3).

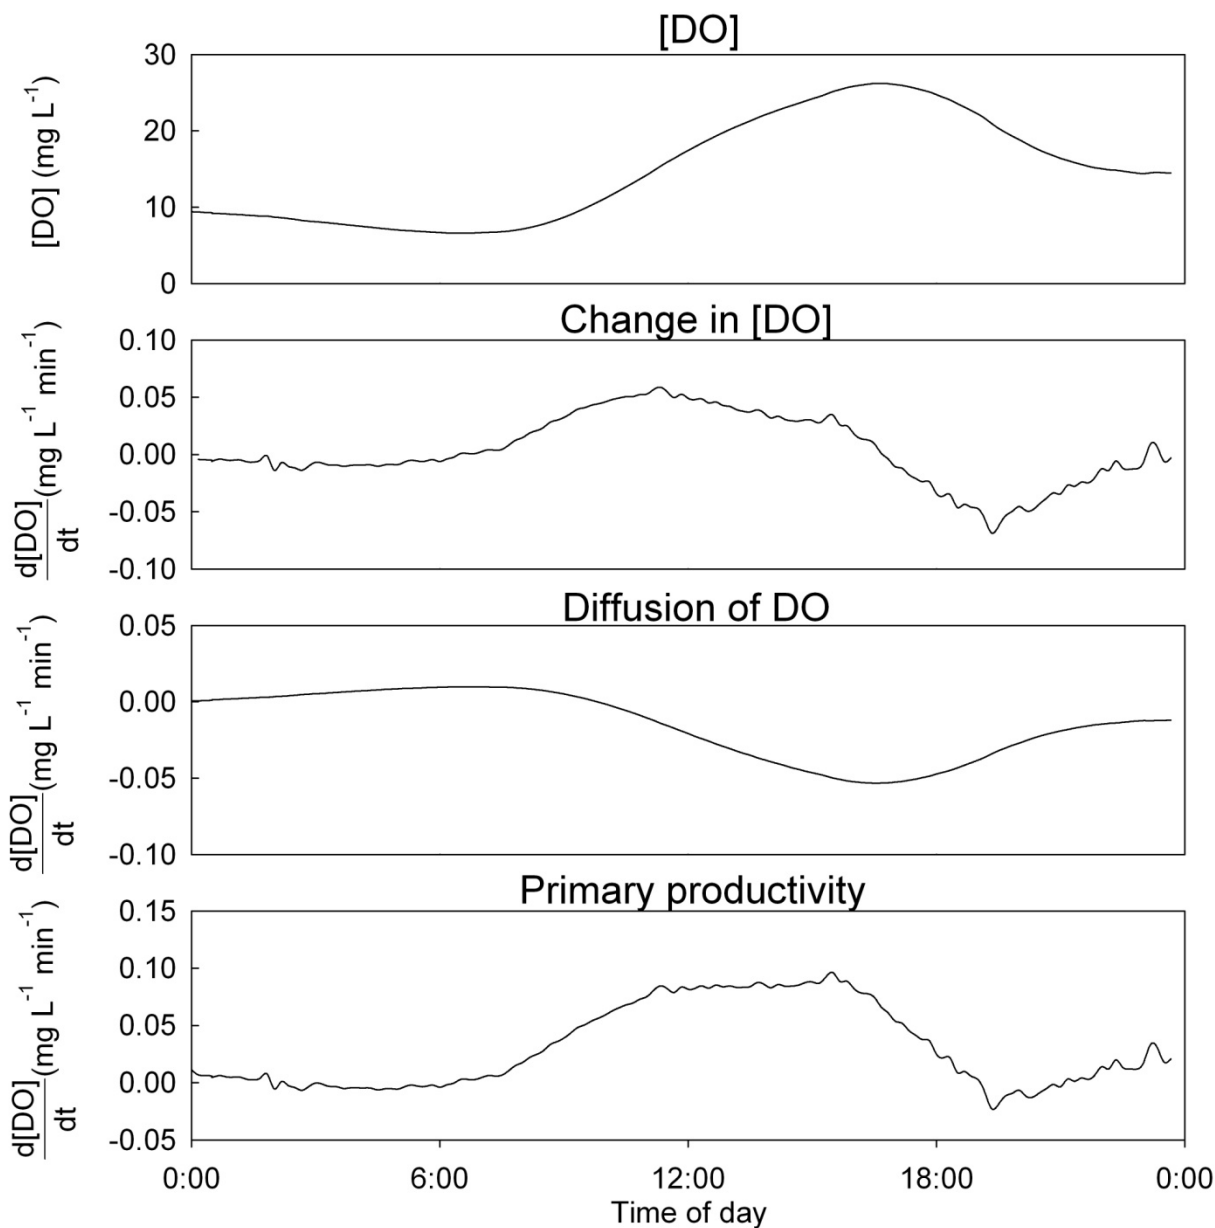

**Figure SI 7.** Example of dissolved oxygen (DO) profiles used to calculate annual primary productivity and respiration rates. Data shown from April 8<sup>th</sup>, 2013 at outlet of pilot-scale wetland (Manta MultiProbe, Eureka Environmental, Austin, TX). Diffusion was based on [DO] before sunrise and after sunset; respiration was based on consumption of DO during night; Primary productivity=Change in [DO]+Respiration-Diffusion of DO.<sup>6</sup>

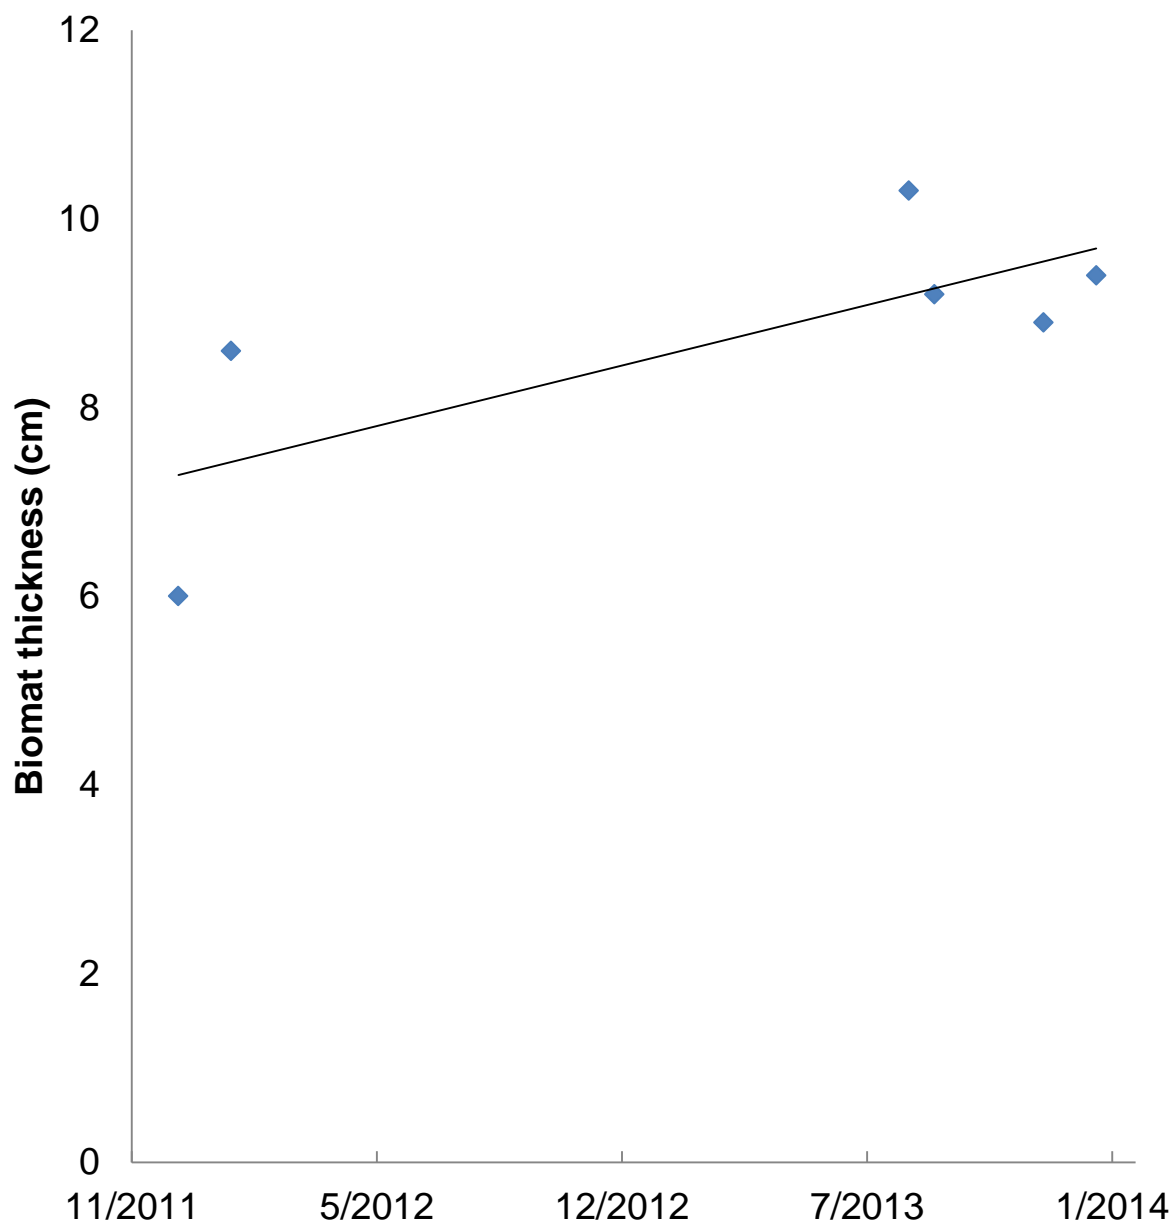

**Figure SI 8.** Average biomat thickness measured throughout the pilot-scale open-water wetland throughout the study period. Slope= $1.2 \pm 0.5 \text{ cm yr}^{-1}$ .  $r^2=0.55$ .

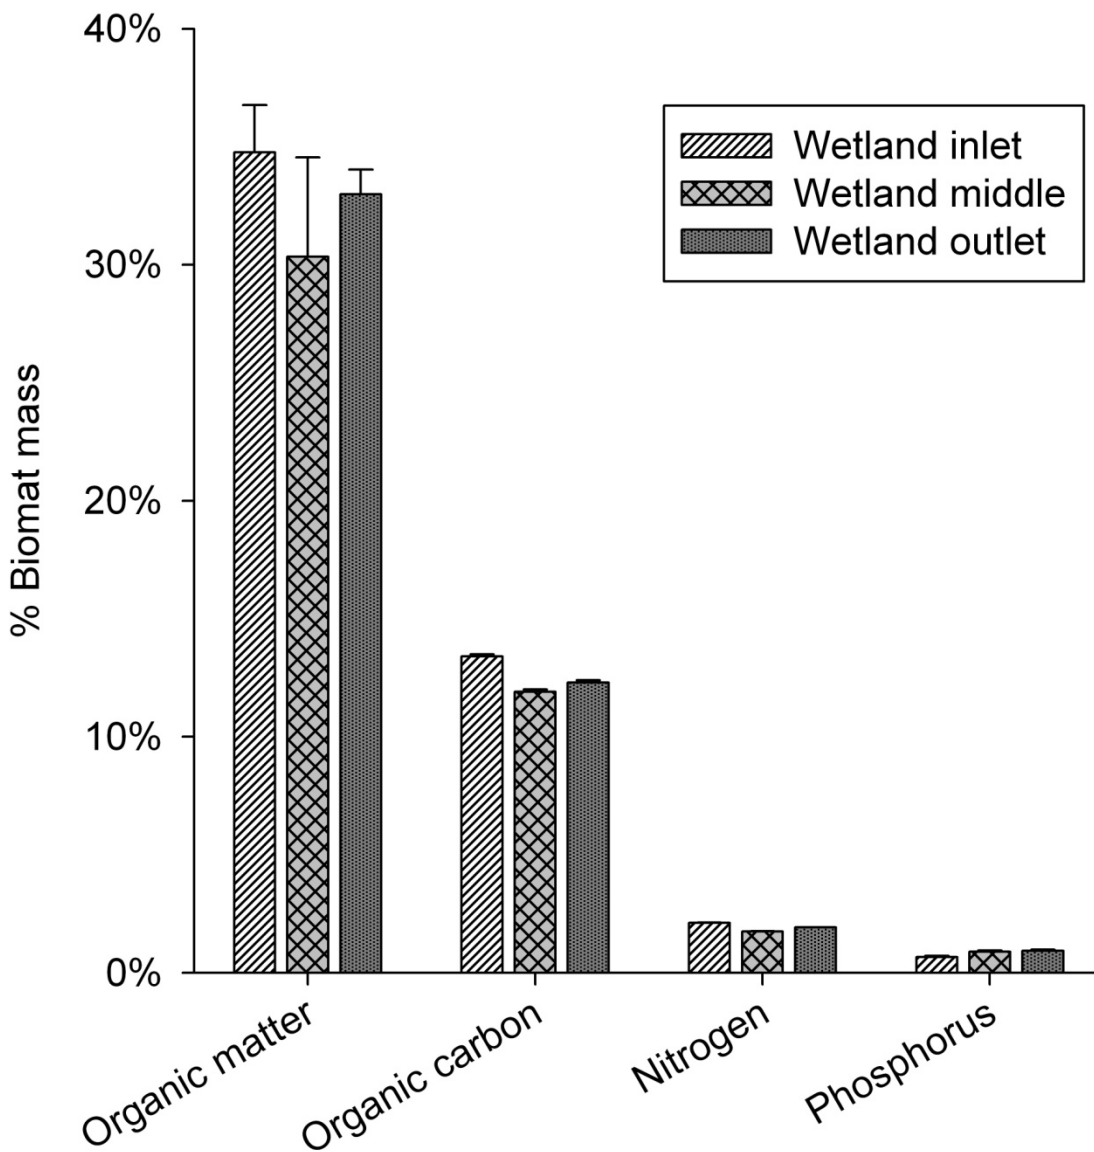

**Figure SI 9.** Percent phosphorous, nitrogen, organic carbon, and organic matter (i.e., volatile solids) by mass in wetland biomat at the inlet, middle, and outlet of open-water wetland on a dry weight basis. Remainder consisted of non-volatile organic matter (i.e., minerals).

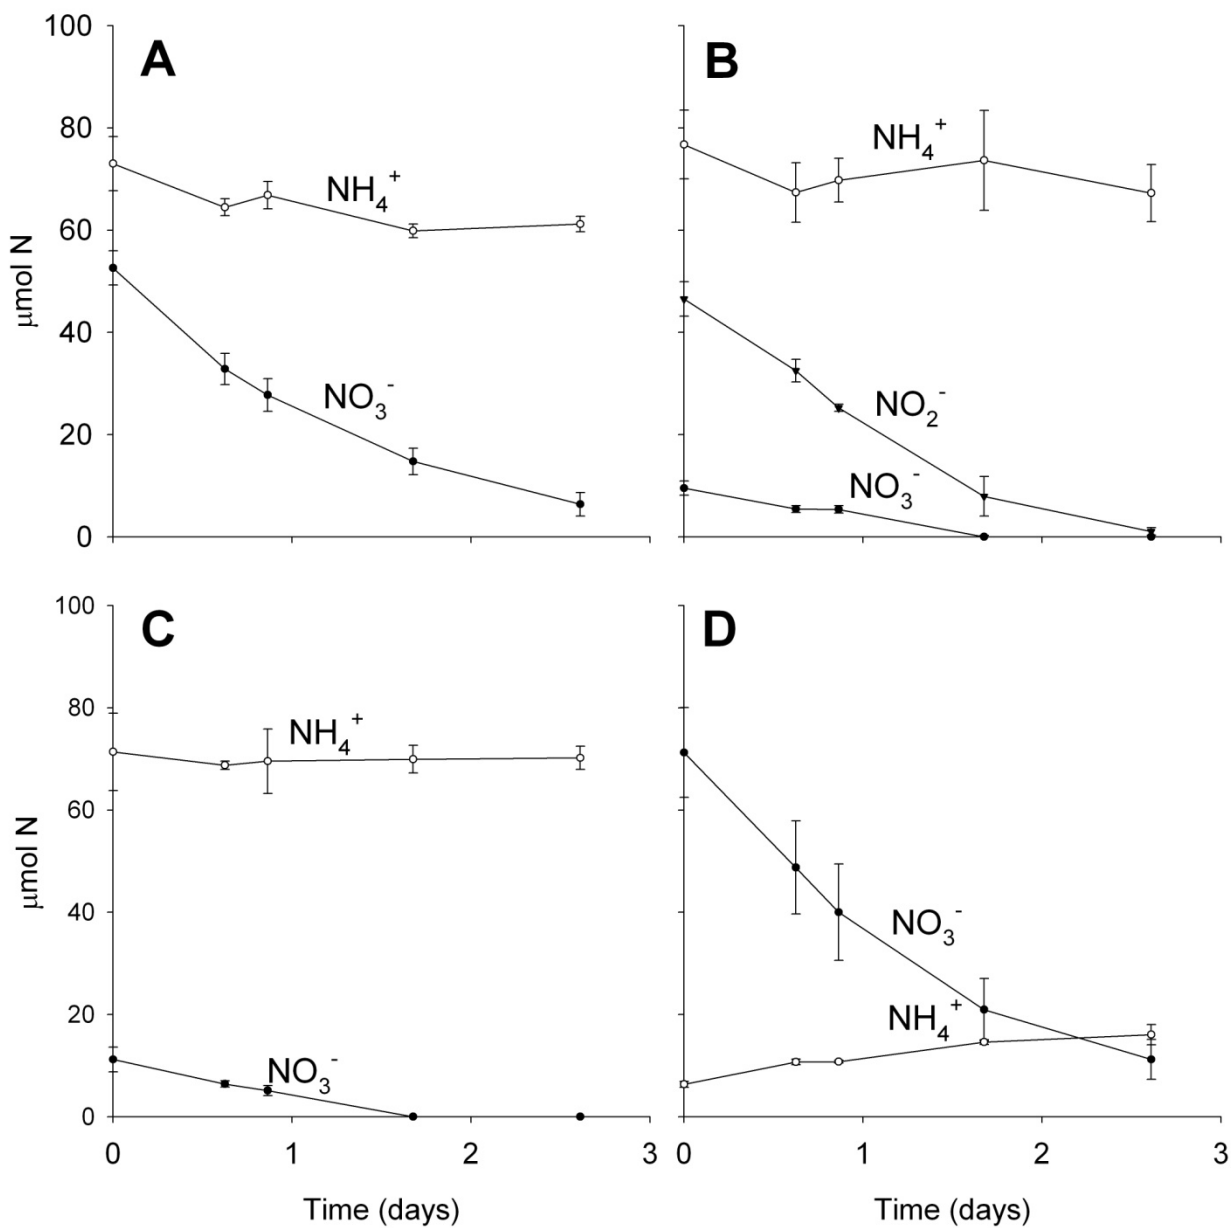

**Figure SI 10.** Concentrations of nitrogen species in anoxic microcosms amended with **A:**  $\text{NH}_4^+$  and  $\text{NO}_3^-$ ; **B:**  $\text{NH}_4^+$  and  $\text{NO}_2^-$ ; **C:**  $\text{NH}_4^+$ ; **D:**  $\text{NO}_3^-$ . Experiment conducted at  $22 \pm 2^\circ\text{C}$ . Error bars represent  $\pm$  one standard deviation ( $n=3$ ).

## References

- (1) Throbäck, IN; Enwall, K; Jarvis, Å; Hallin, S. Reassessing PCR primers targeting nirS, nirK and nosZ genes for community surveys of denitrifying bacteria with DGGE. *FEMS Microbiol. Ecol.* **2004**, 49 (3), 401–417.
- (2) Henry, S; Baudoin, E; López-Gutiérrez, JC; Martin-Laurent, F; Brauman, A; Philippot, L. Quantification of denitrifying bacteria in soils by nirK gene targeted real-time PCR. *J. Microbiol. Methods.* **2004**, 59 (3), 327–335.
- (3) Harhangi, HR; Roy, ML; Alen, T van; Hu, B; Groen, J; Kartal, B; Tringe, SG; Quan, Z-X; Jetten, MSM; Camp, HJMO den. Hydrazine synthase, a unique phylomarker with which to study the presence and biodiversity of anammox bacteria. *Appl. Environ. Microbiol.* **2012**, 78 (3), 752–758.
- (4) Fierer, N; Jackson, JA; Vilgalys, R; Jackson, RB. Assessment of soil microbial community structure by use of taxon-specific quantitative PCR Assays. *Appl. Environ. Microbiol.* **2005**, 71 (7), 4117–4120.
- (5) Metar. Weather history for Livermore, CA. **2013**. Available at: <http://www.wunderground.com/history/airport/KLVK>. Accessed December 17, 2013.
- (6) Odum, HT. Primary production in flowing waters. *Limnol. Oceanogr.* **1956**, 1 (2), 102–117.
